# Supplementary material
Source: PubMed Central journal article supplement (PMC10174090)

Unprocessed blots for Extended Data Fig. 4a

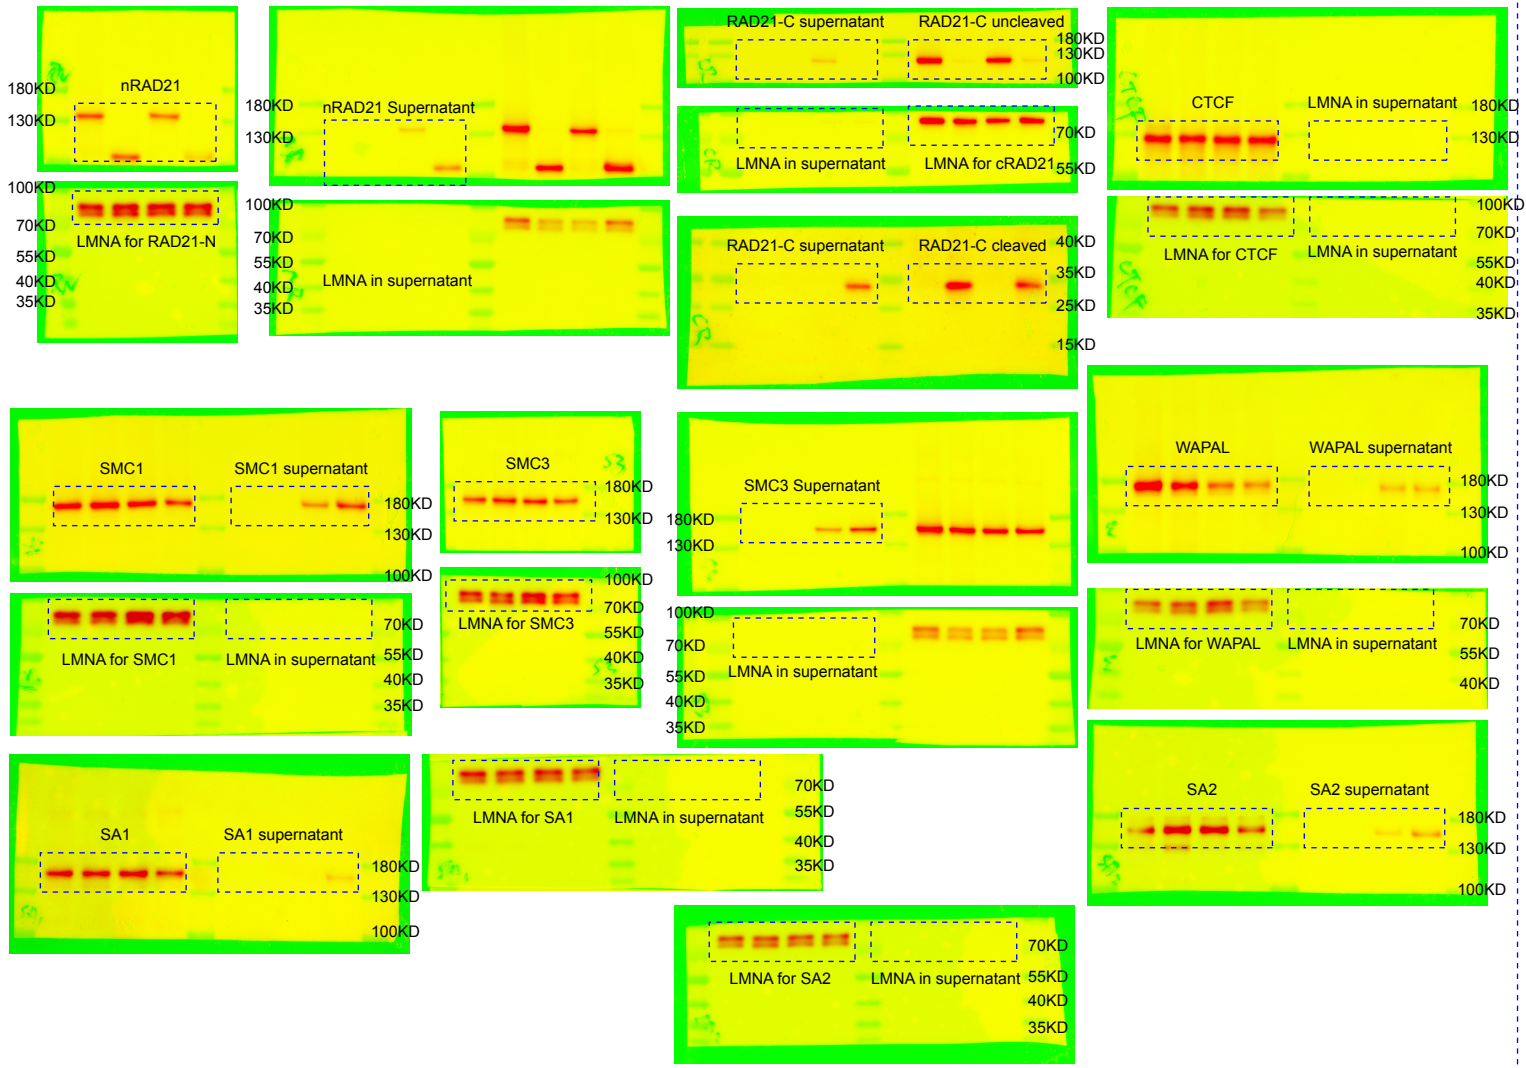

Unprocessed blots for Extended Data Fig. 4b

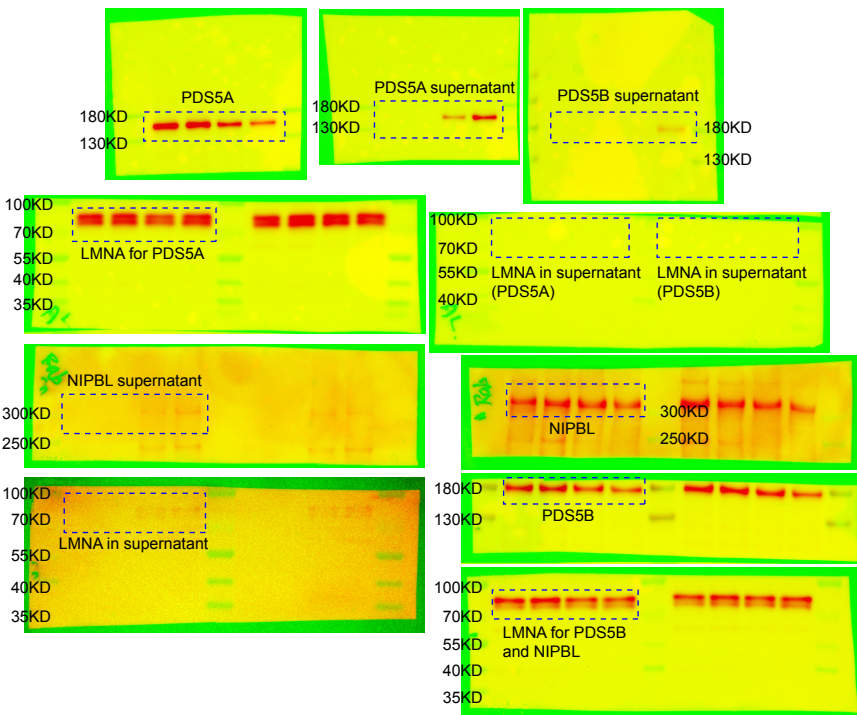

Unprocessed blots for Extended Data Fig. 4c-d

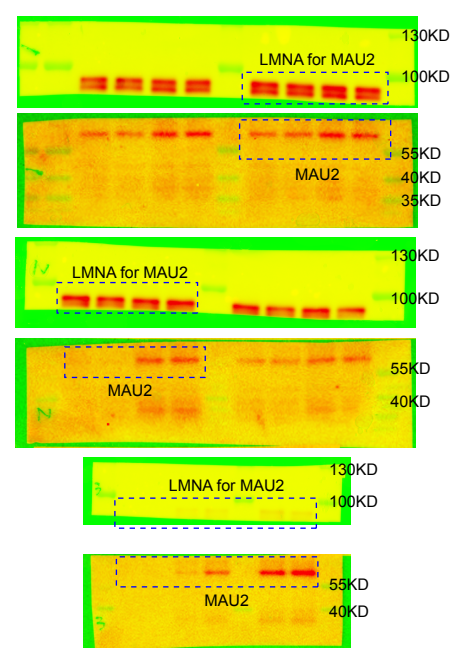

Supplement: NIHMS1888504-supplement-Source_Data_Extended_Data_Figure_4-1.pdf [file NIHMS1888504-supplement-Source_Data_Extended_Data_Figure_4-1.pdf]
