# Supplementary material
Source: PubMed Central journal article supplement (PMC10174090)

**Unprocessed blots for Extended Data Fig. 1b**

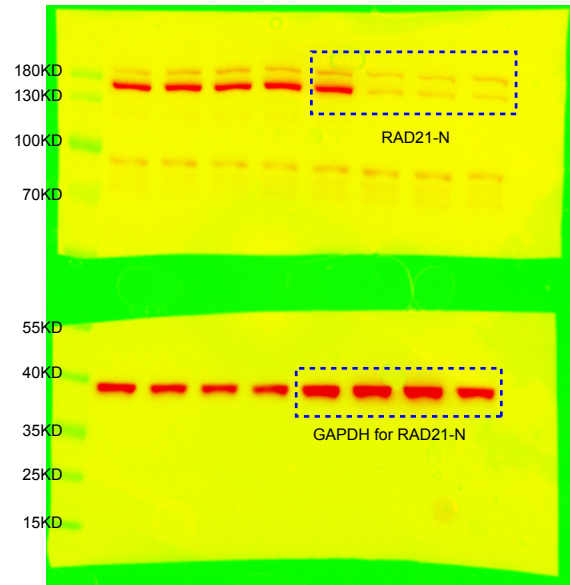

Supplement: NIHMS1888504-supplement-Source_Data_Extended_Data_Figure_1.pdf [file NIHMS1888504-supplement-Source_Data_Extended_Data_Figure_1.pdf]

Unprocessed blots for Extended Data Fig. 6a

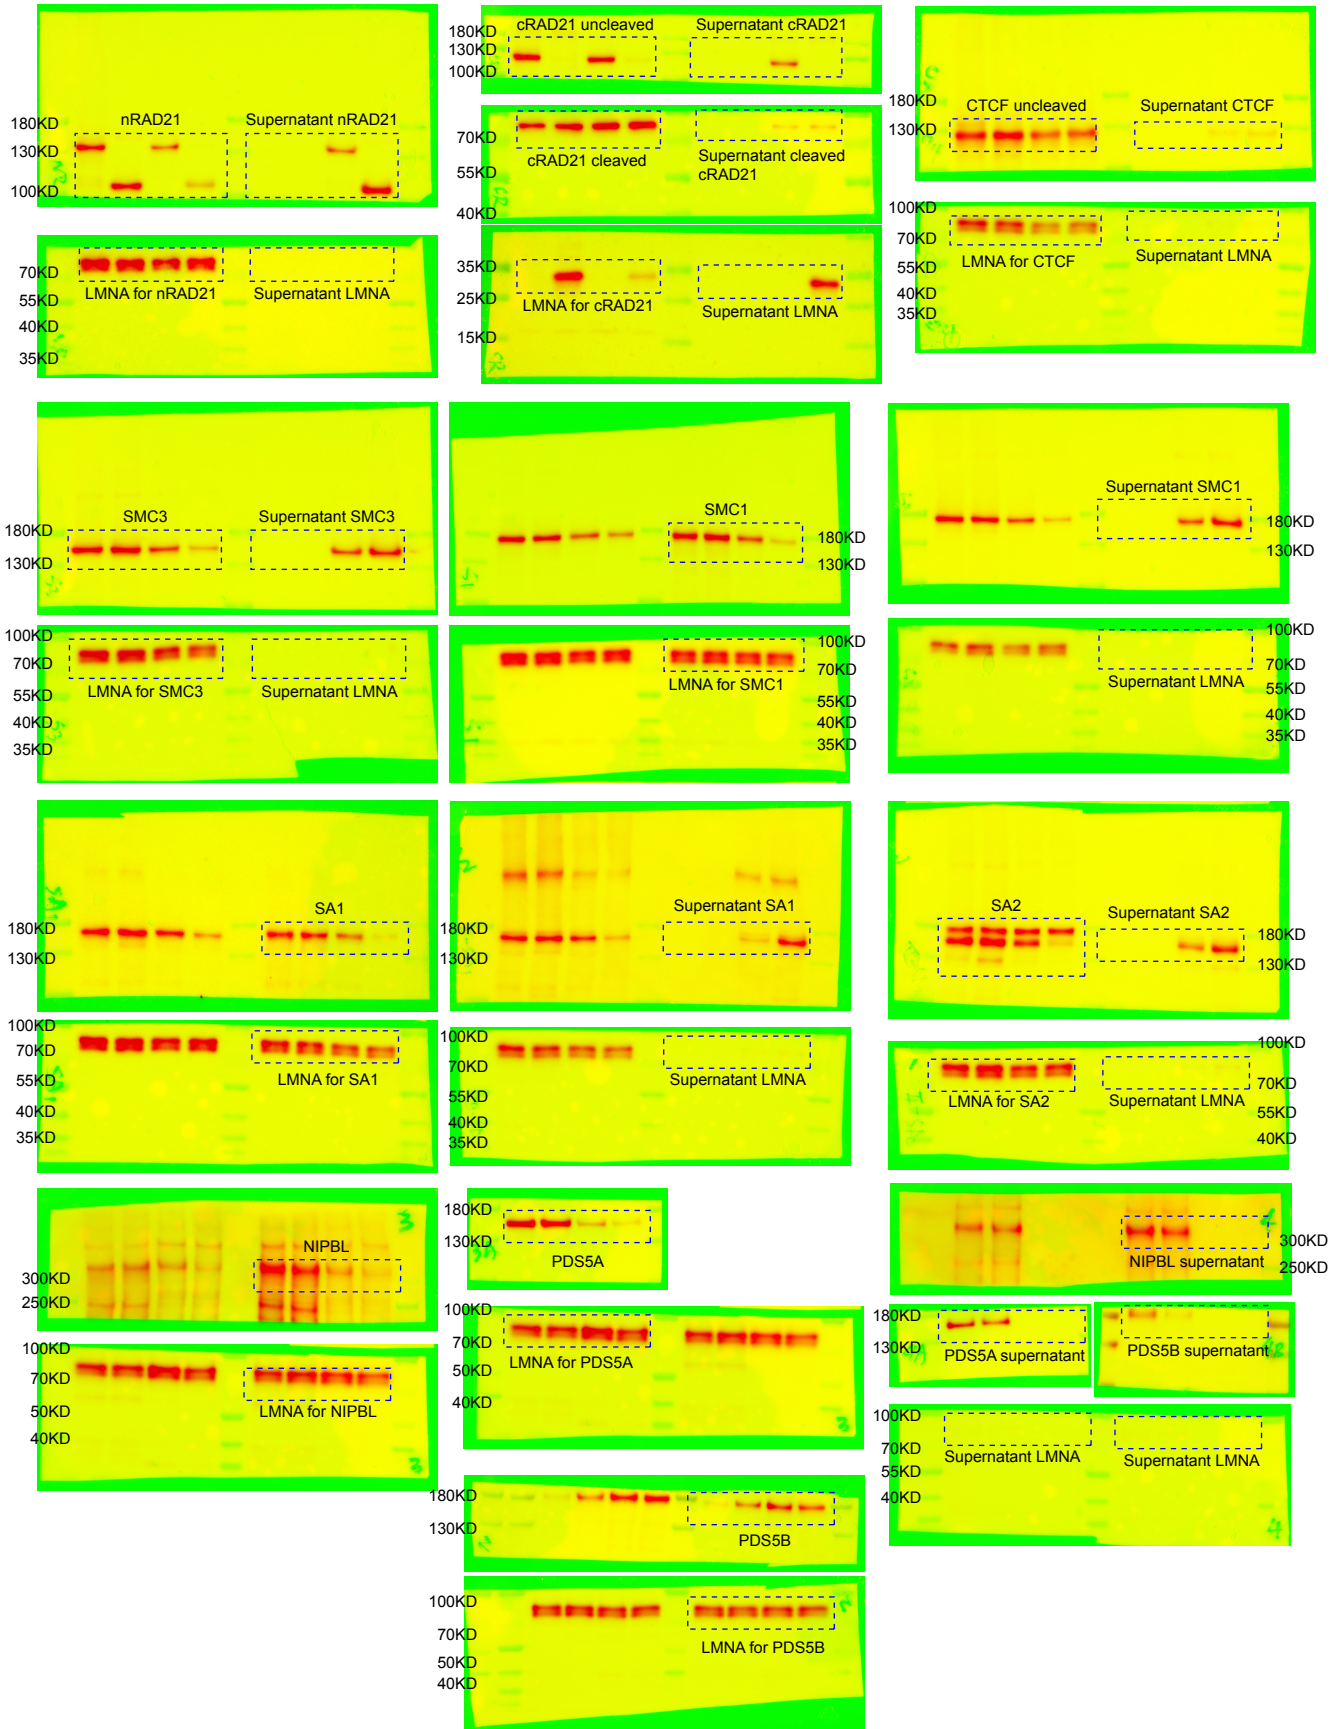

Supplement: NIHMS1888504-supplement-Source_Data_Extended_Data_Figure_6-1.pdf [file NIHMS1888504-supplement-Source_Data_Extended_Data_Figure_6-1.pdf]

Unprocessed blots for Extended Data Fig. 9a

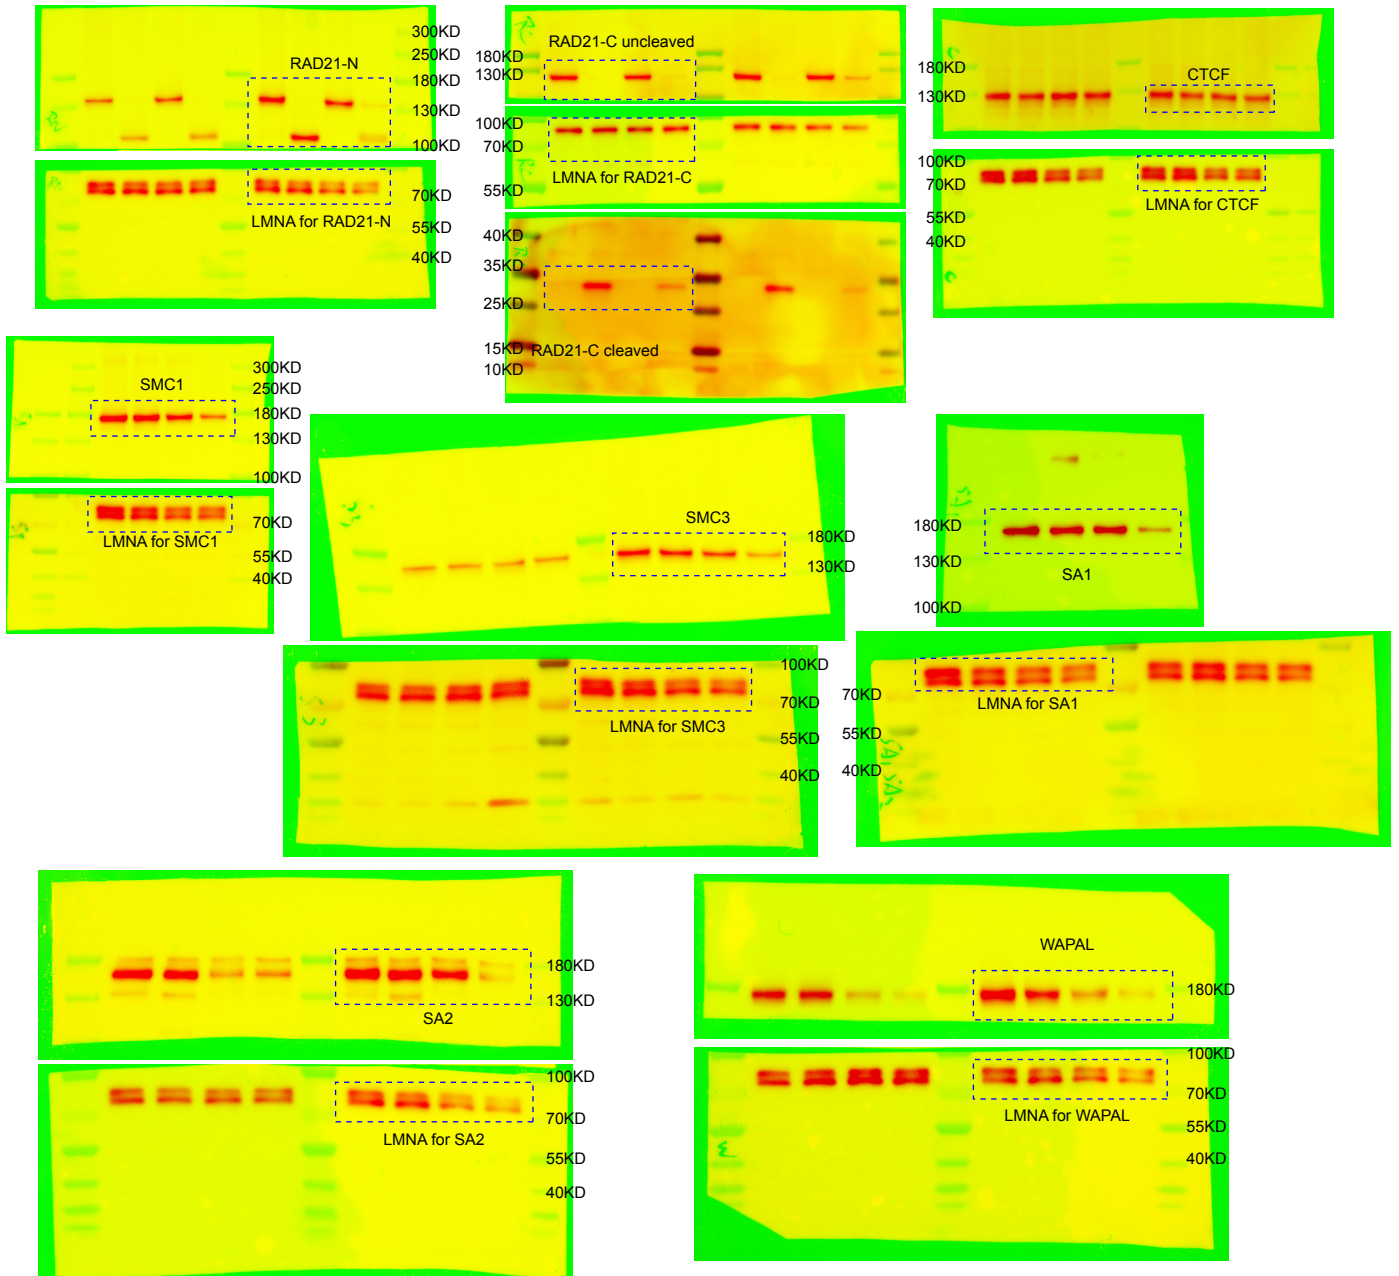

Supplement: NIHMS1888504-supplement-Source_Data_Extended_Data_Figure_9-1.pdf [file NIHMS1888504-supplement-Source_Data_Extended_Data_Figure_9-1.pdf]

Unprocessed blots for Fig. 2b

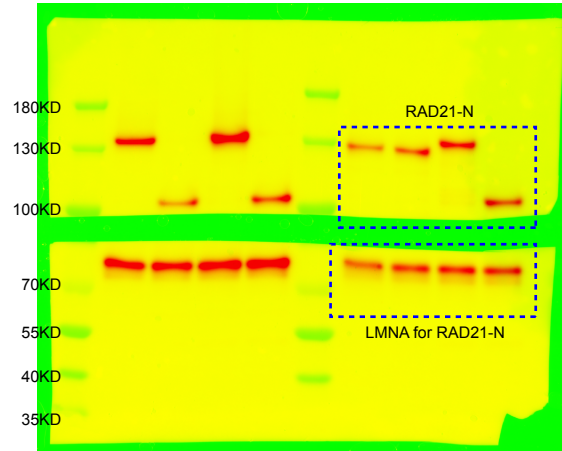

Supplement: NIHMS1888504-supplement-Source_Data_Figure_2-1.pdf [file NIHMS1888504-supplement-Source_Data_Figure_2-1.pdf]

Unprocessed blots for Fig. 3a

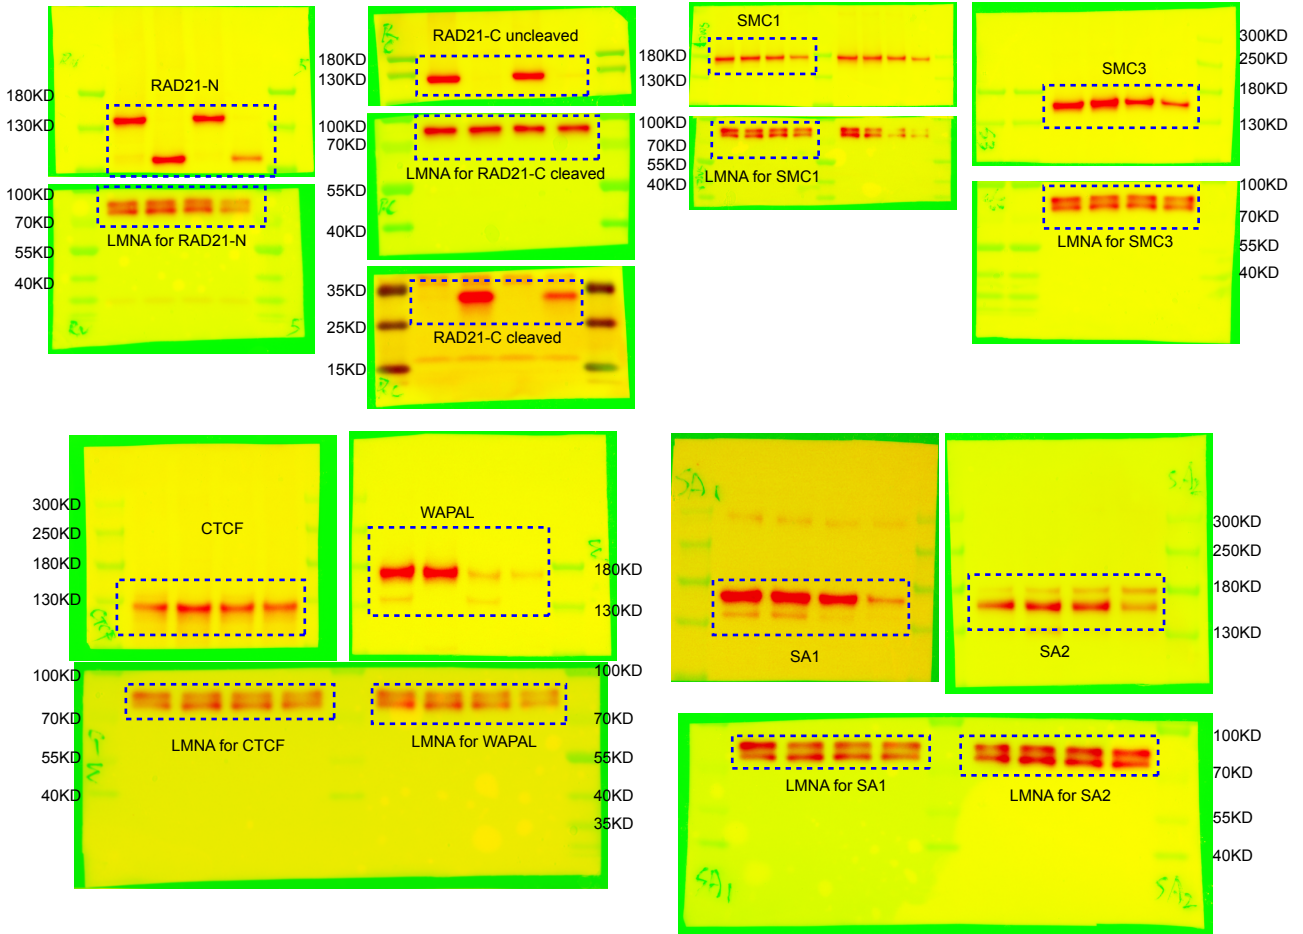

Supplement: NIHMS1888504-supplement-Source_Data_Figure_3-1.pdf [file NIHMS1888504-supplement-Source_Data_Figure_3-1.pdf]
